# Supplementary material for: Perceptions and Beliefs of Healthcare Professionals and Patients About Vaccination During a Non-Severe Febrile Illness: A Qualitative Study
Source: Research Square preprint supplement (doi:10.21203/rs.3.rs-7424852/v1), 2025-10-07
Supplement: Supplementary file 1 [file 714be976f6b282c64faca725.docx]

**SUPPLEMENTARY FILES**

Table 1: Consolidated criteria for reporting qualitative studies (COREQ): 32-item checklist

| Domain 1: research team and reflexivity | | |
| --- | --- | --- |
| Personal characteristics | | |
| 1. Interviewer/facilitator | Which author(s) conducted the interview or focus group? | EV and AW |
| 2. Credentials | What were the researcher’s credentials? (e.g. PhD, MD) | EV and AW were submitting their MD diploma and obtained it after the study’s completion |
| 3. Occupation | What was their occupation at the time of the study? | EV and AW were general practice residents |
| 4. Gender | Was the researcher male or female? | EV and AW were female |
| 5. Experience and training | What experience or training did the researcher have? | The researchers of this study received training in qualitative research through self-directed study of relevant literature and methodological guidelines |
| Relationship with participants | | |
| 6. Relationship established | Was a relationship established prior to study commencement? | No prior relationship was established between the researchers and participants |
| 7. Participant knowledge of the interviewer | What did the participants know about the researcher? (e.g. personal goals, reasons for doing the research) | Participants knew where the researchers worked and the purpose of the research |
| 8. Interviewer characteristics | What characteristics were reported about the interviewer/facilitator? (e.g. bias, assumptions, reasons and interests in the research topic) | EV and AW had a professional interest in the research topic as general practitioners. |
| Domain 2: study design | | |
| Theoretical framework | | |
| 9. Methodological orientation and theory | What methodological orientation was stated to underpin the study? (e.g. grounded theory, discourse analysis, ethnography, phenomenology, content analysis) | Inductive coding with a grounded theory approach was used. |
| Participant selection | | |
| 10. Sampling | How were participants selected? (e.g. purposive, convenience, consecutive, snowball) | Purposive sampling was used to select patients that presented fever in the 7 days preceding the interview and HCPs that perform vaccination in their everyday practice. Snowball sampling was used for HCPs to refer to others with similar expertise in their network. |
| 11. Method of approach | How were participants approached? (e.g. face to face, telephone, mail, e-mail) | Interviews were either face-to face or over the phone depending on the participants’ proximity and availability. |
| 12. Sample size | How many participants were in the study? | Fifteen patients (adults or parents of children with a recent FI) and fifteen HCPs (9 GPs, 4 pharmacists and 2 Infectious diseases specialists) were interviewed |
| 13. Non-participation | How many people refused to participate or dropped out? Reasons? | There were no refusals to participate in this study |
| Setting | | |
| 14. Setting of data collection | Where was the data collected? (e.g. home, clinic, workplace) | Interviews took place either in the infectious diseases department of the university hospital of Saint-Etienne or in General practice offices |
| 15. Presence of non-participants | Was anyone else present besides the participants and researchers? | Only the researchers and the participants were present (or their parents in case of febrile children) |
| 16. Description of sample | What are the important characteristics of the sample? (e.g. demographic data, date) | No other demographic information was collected about participants |
| Data collection | | |
| 17. Interview guide | Were questions, prompts, guides provided by the authors? Was it pilot tested? | The interview guides were provided by the authors, they were refined as the interviews progressed |
| 18. Repeat interviews | Were repeat interviews carried out? If yes, how many? | No repeat interviews were required |
| 19. Audio/visual recording | Did the research use audio or visual recording to collect the data? | Interviews were audio-recorded |
| 20. Field notes | Were field notes made during and/or after the interview or focus group? | No |
| 21. Duration | What was the duration of the interviews or focus group? | Patients’ interviews duration ranged from 18 minutes and 54 seconds to 56 minutes and 18 seconds.  HCPs’ interviews duration ranged from 13 minutes and 15 seconds to 35 minutes and 48 seconds |
| 22. Data saturation | Was data saturation discussed? | Data saturation was reached when no new themes or insights emerged from the interviews |
| 23. Transcripts returned | Were transcripts returned to participants for comment and/or correction? | Transcripts were not returned to participants |
| Domain 3: analysis and findings | | |
| Data analysis | | |
| 24. Number of data coders | How many data coders coded the data? | Three researchers (EV, AW and SE) independently coded the data |
| 25. Description of the coding tree | Did authors provide a description of the coding tree? | No |
| 26. Derivation of themes | Were themes identified in advance or derived from the data? | Themes were derived from the data |
| 27. Software | What software, if applicable, was used to manage the data? | Microsoft Excel |
| 28. Participant checking | Did participants provide feedback on the findings? | No |
| Reporting | | |
| 29. Quotations presented | Were participant quotations presented to illustrate the themes/findings? Was each quotation identified? (e.g. participant number) | Quotations have been presented throughout the results and are also summarized in *Tables 3 and 4* with participant codes assigned to all participants and used for the quotations |
| 30. Data and findings consistent | Was there consistency between the data presented and the findings? | Yes, the data presented are consistent with our findings. |
| 31. Clarity of major themes | Were major themes clearly presented in the findings? | Yes, major themes are clearly presented in the results. |
| 32. Clarity of minor themes | Is there a description of diverse cases or discussion of minor themes? | No |

Table 2: Patient interview guide

| Themes | Questions | Observations |
| --- | --- | --- |
| Febrile state | Can you tell me in what context you (or your child) recently had a fever? | Exploring recent fever experience |
| Vaccination | Can you tell me about your (or your child's) most recent vaccination experience? | Exploring the vaccination experience |
| Planning | Can you tell me how to procure a vaccine? | Identifying obstacles to vaccination |
| Informations | How do you keep up to date with upcoming vaccinations? | Exploring resources |
| Representations | Why do we get vaccinated?  What do you expect from a vaccine for yourself and for others? | Exploring representations and hesitation factors |
| Indications and contraindications | In your opinion, when is the right time to get vaccinated? When not to get vaccinated? | Searching for reasons for vaccine postponement |
| SETTING THE SCENE:  Let us imagine a situation: You consult your GP (or specialist in a particular field) because you have had a fever for about 2 days. After examining you, the doctor concludes that you have an infection that is not likely to progress. During this consultation, the doctor notices that one of your vaccinations is not up to date. He suggests that you take advantage of this consultation to be vaccinated. | | |
| Reaction | How would you react to this situation? What would make you accept vaccination? What are the factors that might influence your decision? | Exploring attitudes and opinions  Identifying influencing factors |
| Influencing factors | If these have not been mentioned, then make suggestions using different factors:  Temperature value / General condition / Disease evolution / Symptoms / Etiology/  Concerned vaccine /Physician/  Other health professionals /Rescheduling | Exploring different factors to identify facilitating elements or barriers. |
| other | Are there any other factors that might influence your choice? |  |
| SETTING THE SCENE:  I would like you to think about four additional pieces of information the doctor might provide during this consultation. For each one, I will ask you to explain how it would influence your decision. | | |
| Information provided | No change in the course of the ongoing illness  No contraindications  No increase in adverse effects  Better efficacy | |
| Opening | If a study were conducted to evaluate the efficacy of vaccination in the presence of fever, would you be willing to participate? Please explain your decision. | |

Table 3: Interview guide for healthcare professionals

| Themes | Questions | Observations |
| --- | --- | --- |
| Population | Can you introduce yourself as a physician/pharmacist...? | Sample characteristics |
| Vaccination | Could you tell me about your last consultation/experience regarding a vaccination? | an ice-breaking question  Exploring the practitioner's habits |
| For scheduled vaccinations, what do you consider to be the main contraindications? |
| SETTING THE SCENE:  I would like you to imagine a situation where a patient initially made an appointment for a vaccination booster, but ultimately shows up with a mild febrile condition. After your questioning and clinical examination, you rule out a serious illness. | | |
| Fever | How would your patient's fever affect your vaccination practice? How do you assess the urgency of the vaccination? Do you consider it serious to postpone a vaccination? | Refocusing the topic on vaccination during a febrile illness |
| What information about vaccination during a febrile illness was provided to you during your training? | What are the beliefs conveyed by training? |
| How does the type of vaccine influence your decision to vaccinate or postpone vaccination? | To explore if the reluctance could be related to the type of vaccine |
| How would the viral or bacterial origin of the fever influence your decision? | To explore if the origin of the fever is important. |
| In case of a well-tolerated fever of unknown origin, what vaccination approach would you consider? |
| Reluctance | What are your concerns about vaccinating a patient in a febrile state? | De quoi a-t-il peur ? |
| Quels paramètres vous feraient changer d’avis (dans un sens ou dans l’autre) ? | What is he/she afraid of? |
| In general, how do you inform your patients about :  - The benefits of vaccines?  - Their safety?  - The role of adjuvants? |  |
| Professional development | How do you stay up to date on new vaccination recommendations? How do you get trained in vaccination? |  |
| The next steps | If you decide to postpone vaccination, how do you proceed with the next steps ? | Has the healthcare professional developed a strategy from the outset to prevent loss of follow-up |
| SETTING THE SCENE :  I would like you to imagine a situation in which you have a supply of vaccines available in your practice.  A patient comes to you with a febrile infection. After questioning and examination, you conclude that the patient is stable, the fever is well tolerated and the infection is not severe. Looking at your patient's records, you realize that his vaccinations are not up to date. | | |
| Supply | How would having vaccines available in your practice help you catch up on the vaccination schedule in case of delay due to a febrile illness? | Does having the vaccine available improve the vaccination process? |
|  | How has the COVID-19 pandemic changed your vaccination habits? | To explore potential changes in practices |
| Change in practices | What frame of reference would you need to change your practices? | To explore the willingness to change |
| Opening | Would you like to address any other aspects of vaccination during a febrile illness that we haven't had the chance to discuss and that you consider essential? |  |
